# Supplementary material
Source: ML conference proceedings conference paper supplement (https://openreview.net/forum?id=QmgEUx2Cd7)

relative error

$10^{-4}$

$10^{-5}$

$10^{-6}$

Torch/Adam + AutoGrad  
(runtime  $\times 48$ )

SciPy/L-BFGS-B + AutoGrad  
(runtime  $\times 7$ )

SciPy/L-BFGS-B

relative runtime

1

5

10

50

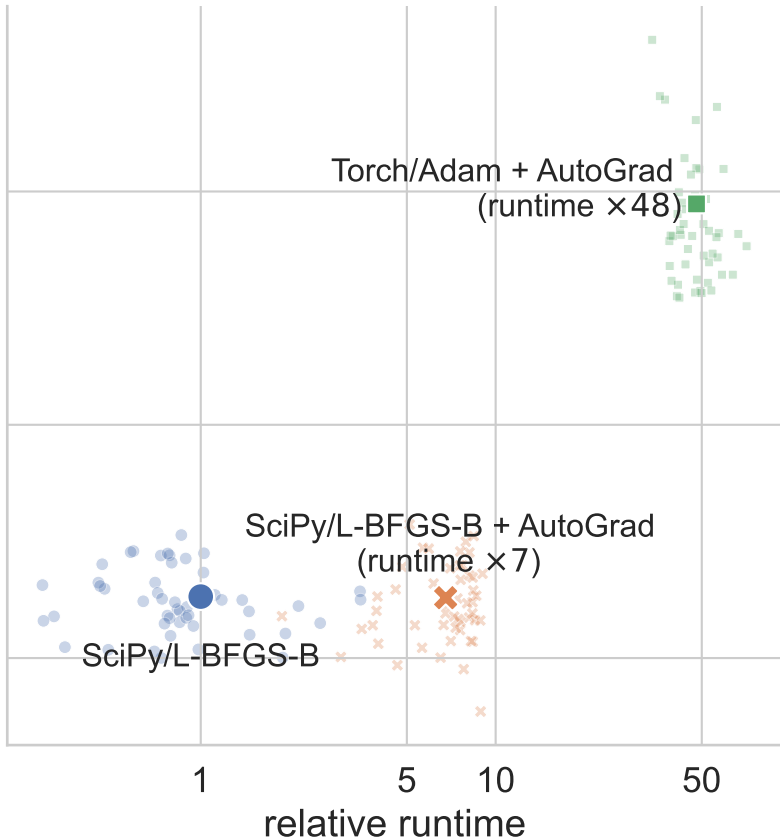

Supplement: supplementary_material [file torch_speedtest.pdf › lore_code/env/cblearn/paper/images/torch_speedtest.pdf]
