# Supplementary material
Source: ML conference proceedings conference paper supplement (https://openreview.net/forum?id=QmgEUx2Cd7)

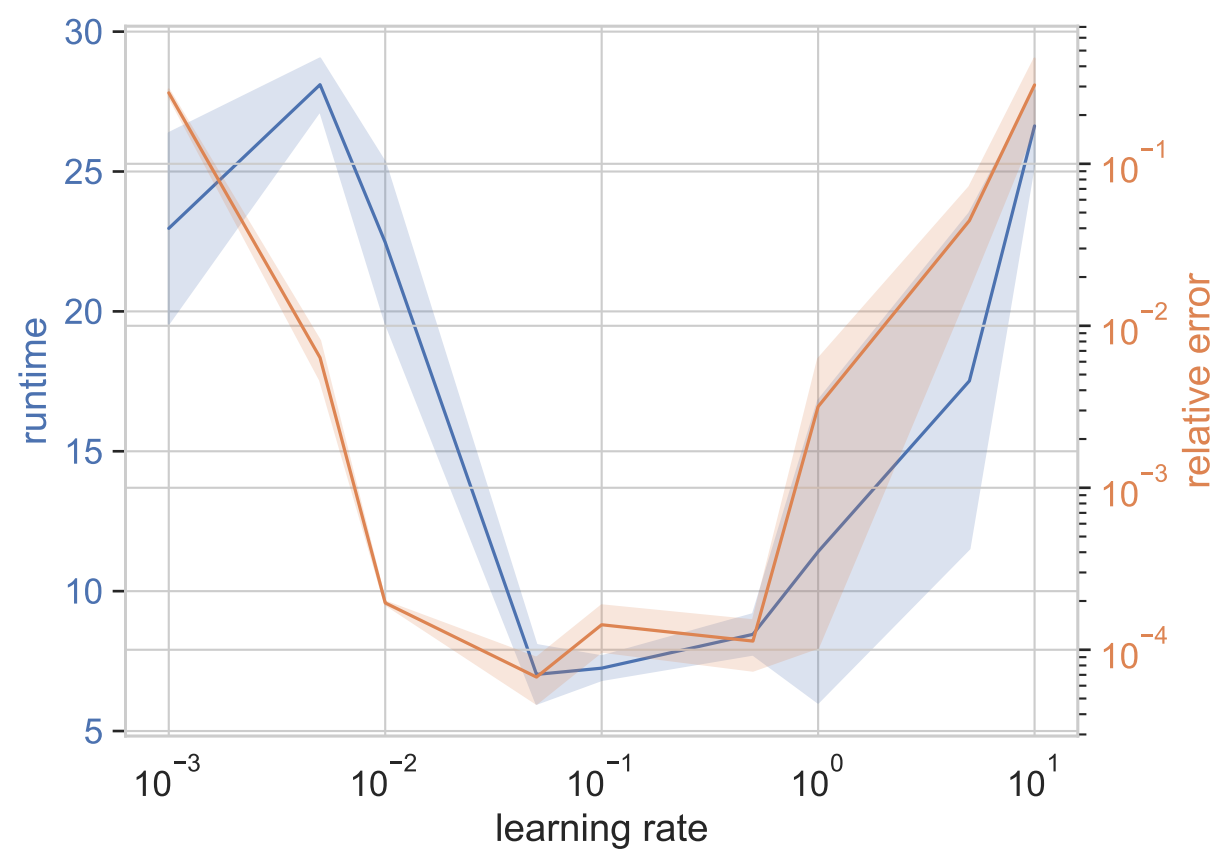

Supplement: supplementary_material [file adam_lr.pdf › lore_code/env/cblearn/paper/images/adam_lr.pdf]

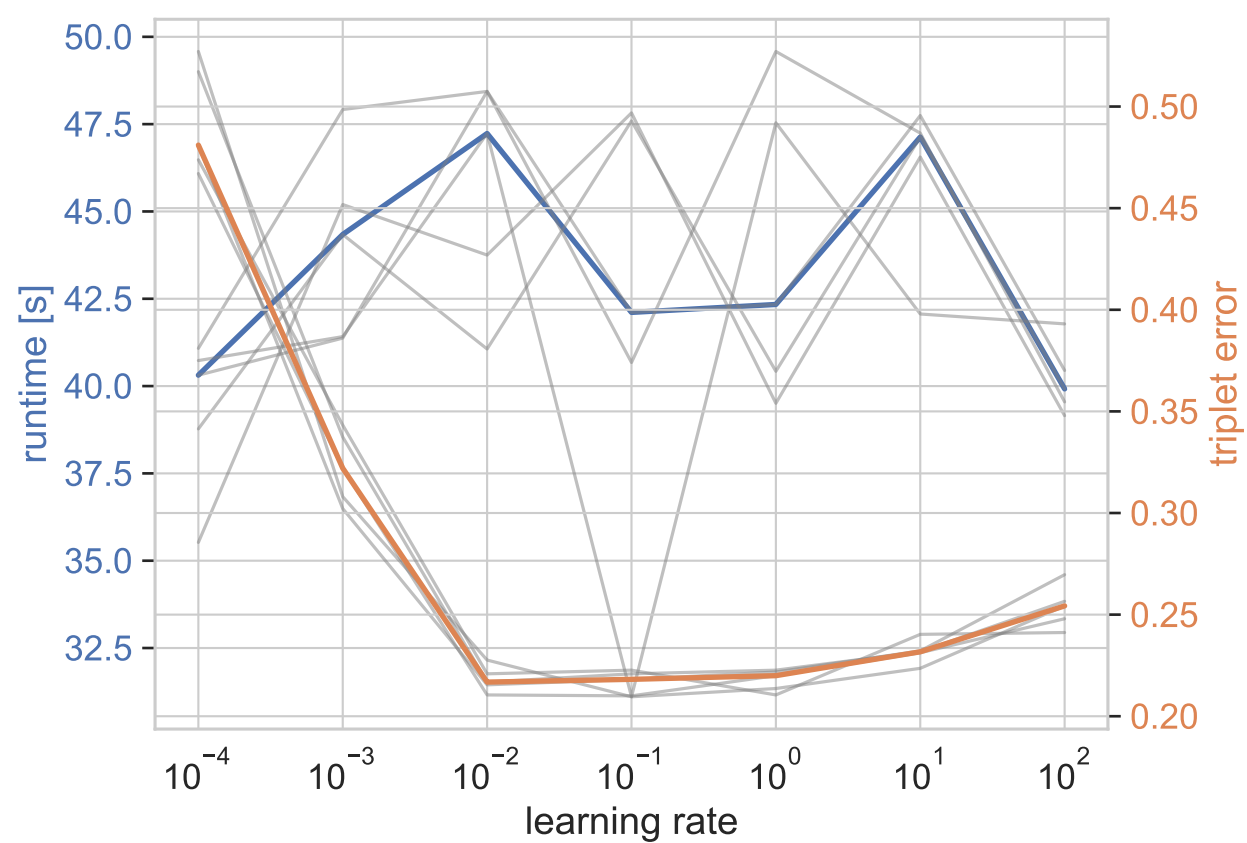

Supplement: supplementary_material [file adam_lr_triplet.pdf › lore_code/env/cblearn/paper/images/adam_lr_triplet.pdf]

accuracy=0.80

- OFF-ROAD / SPORT UTILITY VEHICLES
- ORDINARY CARS
- SPORTS CARS
- OUTLIERS

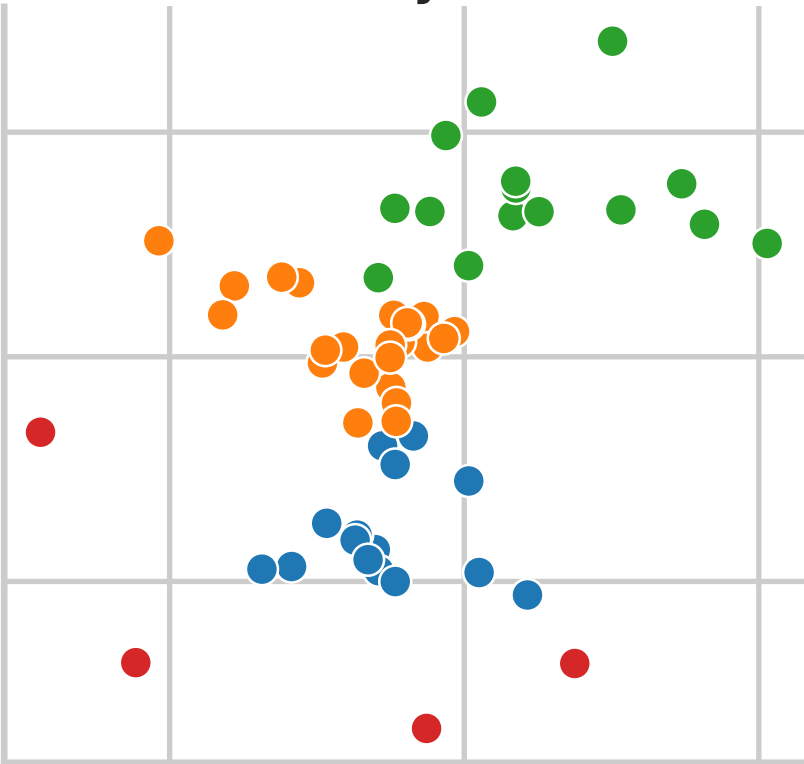

Supplement: supplementary_material [file car_example.pdf › lore_code/env/cblearn/paper/images/car_example.pdf]

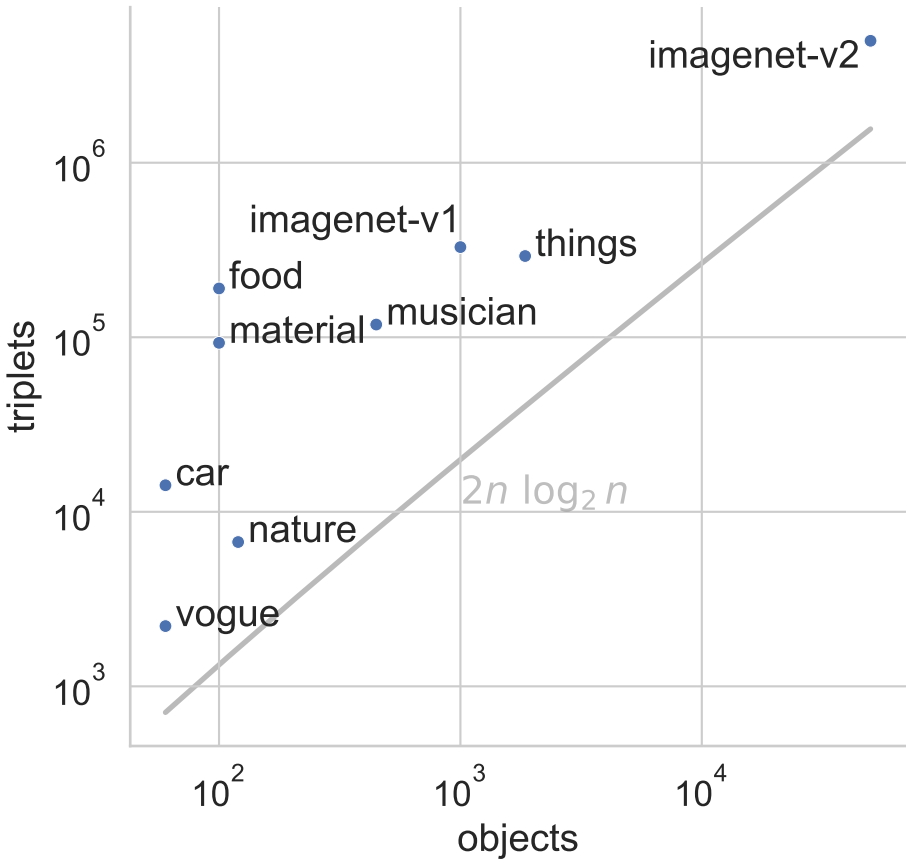

Supplement: supplementary_material [file datasets.pdf › lore_code/env/cblearn/paper/images/datasets.pdf]

triplet error rel. to dataset average

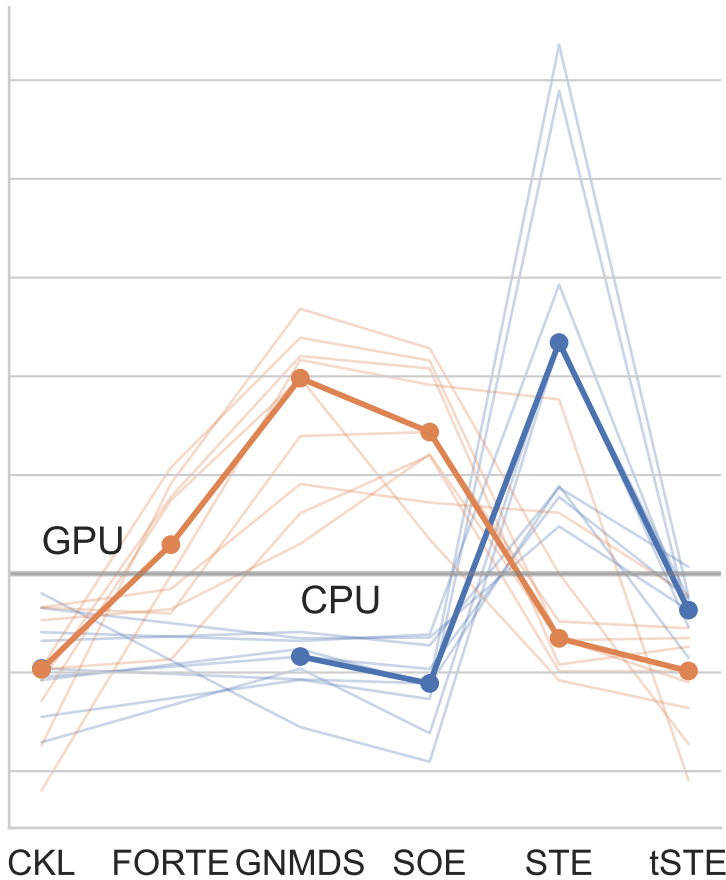

Supplement: supplementary_material [file deltaerror-per-algorithm_cblearn-all.pdf › lore_code/env/cblearn/paper/images/deltaerror-per-algorithm_cblearn-all.pdf]

triplet error rel. to dataset average

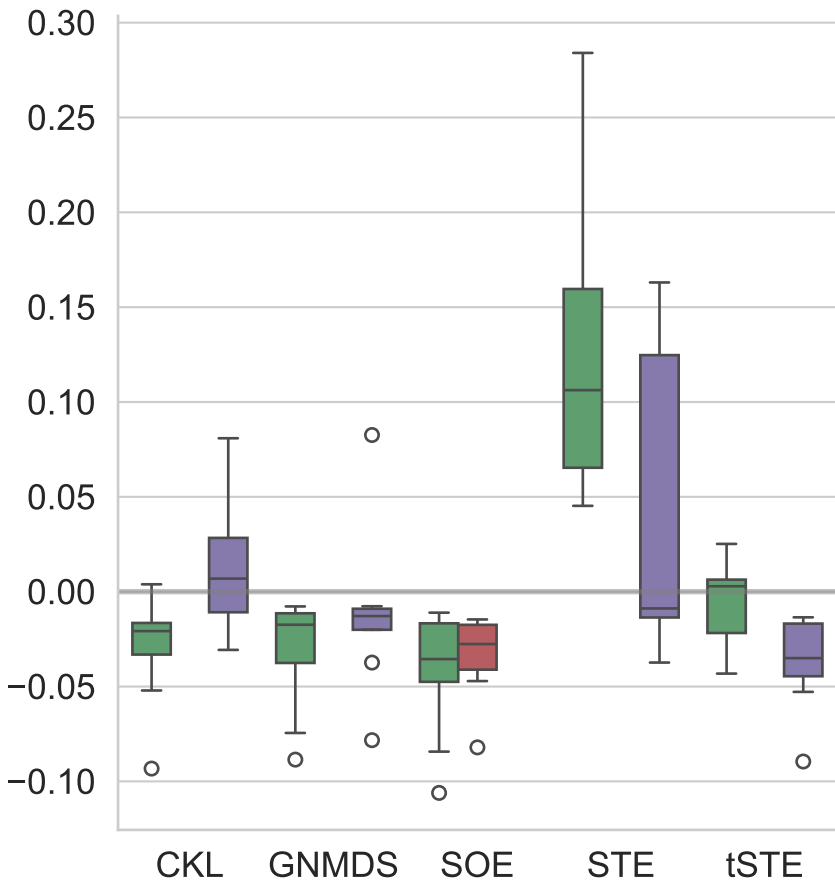

Supplement: supplementary_material [file deltaerror-per-algorithm_library.pdf › lore_code/env/cblearn/paper/images/deltaerror-per-algorithm_library.pdf]

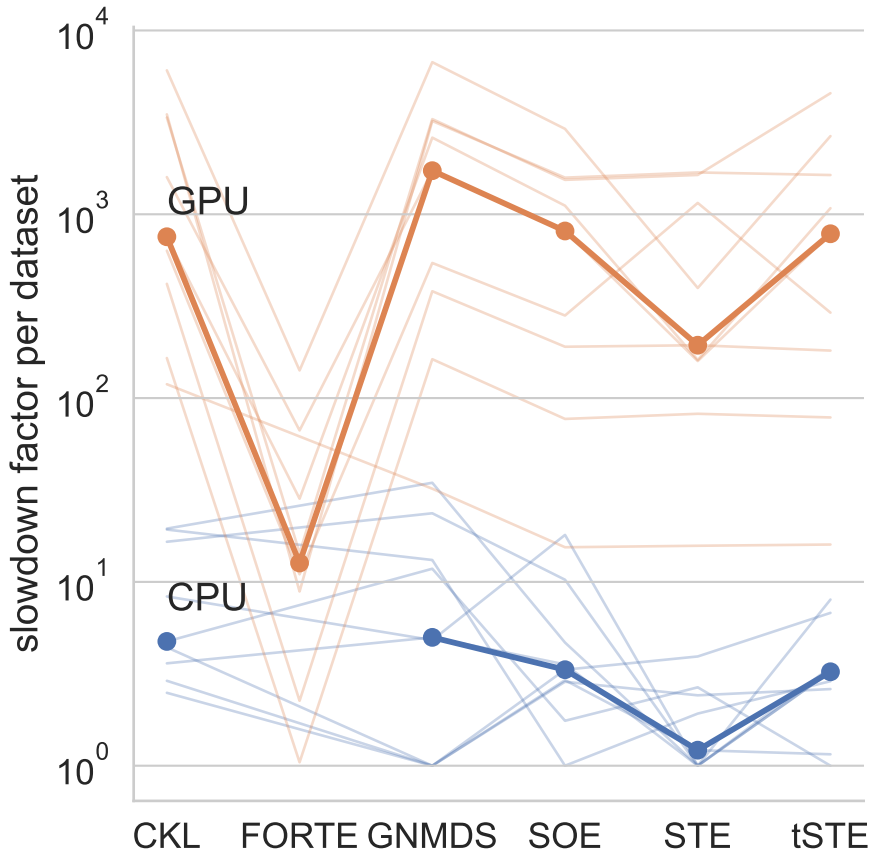

Supplement: supplementary_material [file deltatime-per-algorithm_cblearn-all.pdf › lore_code/env/cblearn/paper/images/deltatime-per-algorithm_cblearn-all.pdf]

slowdown factor per dataset

library

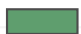

cblearn

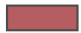

loe

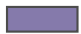

vanderMaaten

$10^4$

$10^3$

$10^2$

$10^1$

$10^0$

CKL

GNMDS

SOE

STE

tSTE

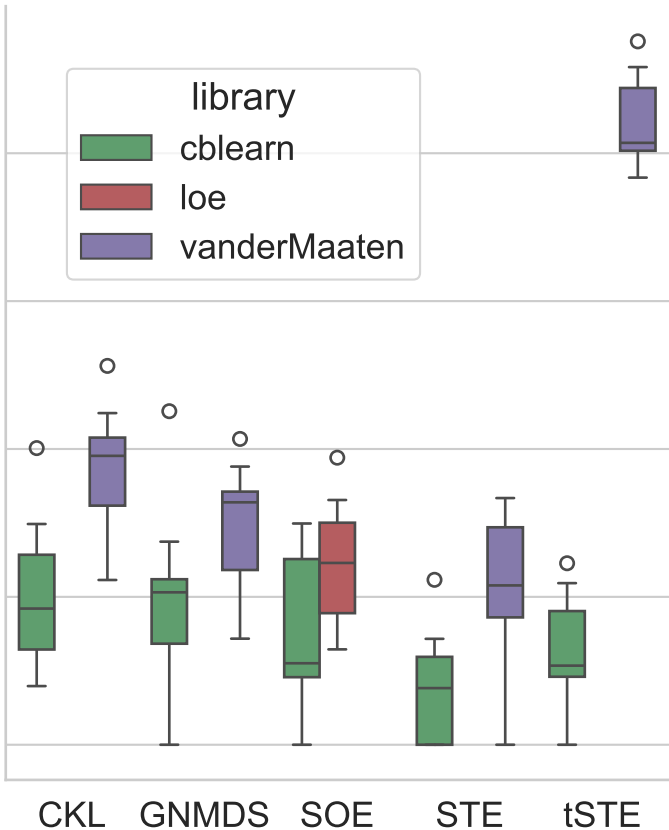

Supplement: supplementary_material [file deltatime-per-algorithm_library.pdf › lore_code/env/cblearn/paper/images/deltatime-per-algorithm_library.pdf]

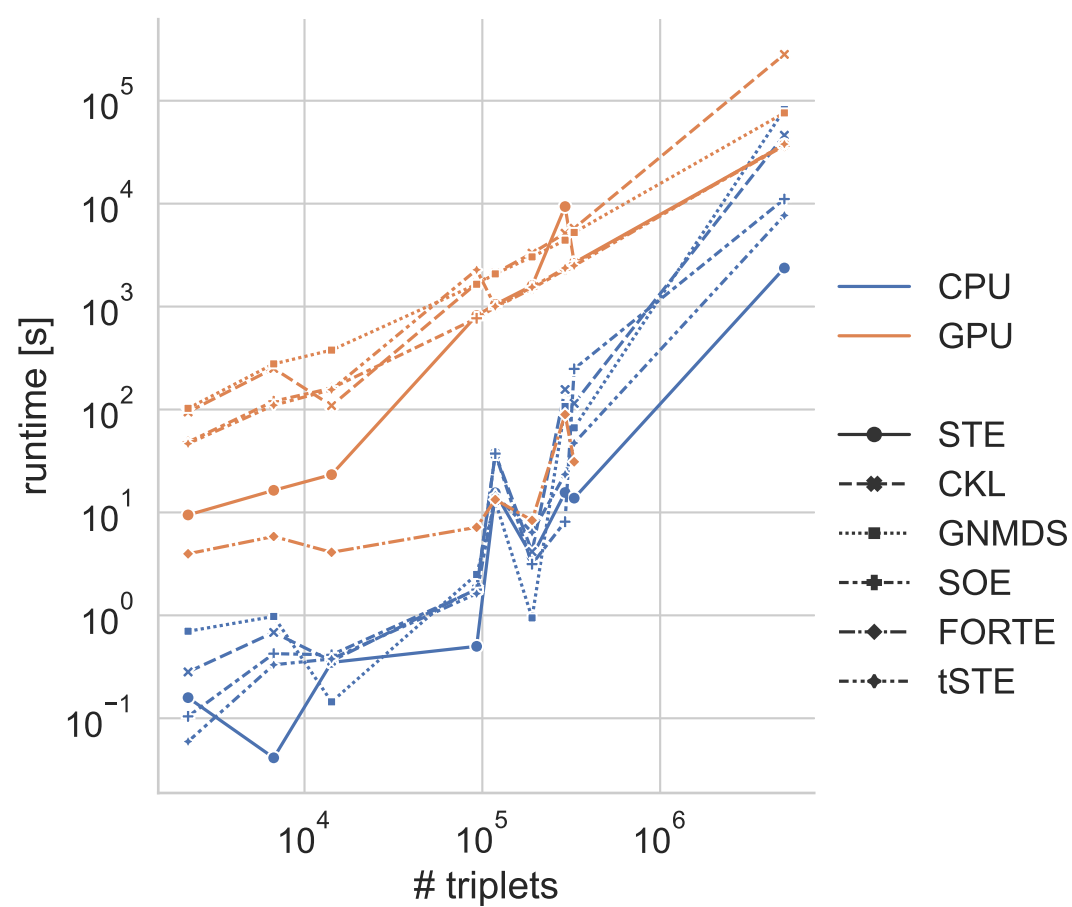

Supplement: supplementary_material [file time-per-triplets_gpu.pdf › lore_code/env/cblearn/paper/images/time-per-triplets_gpu.pdf]

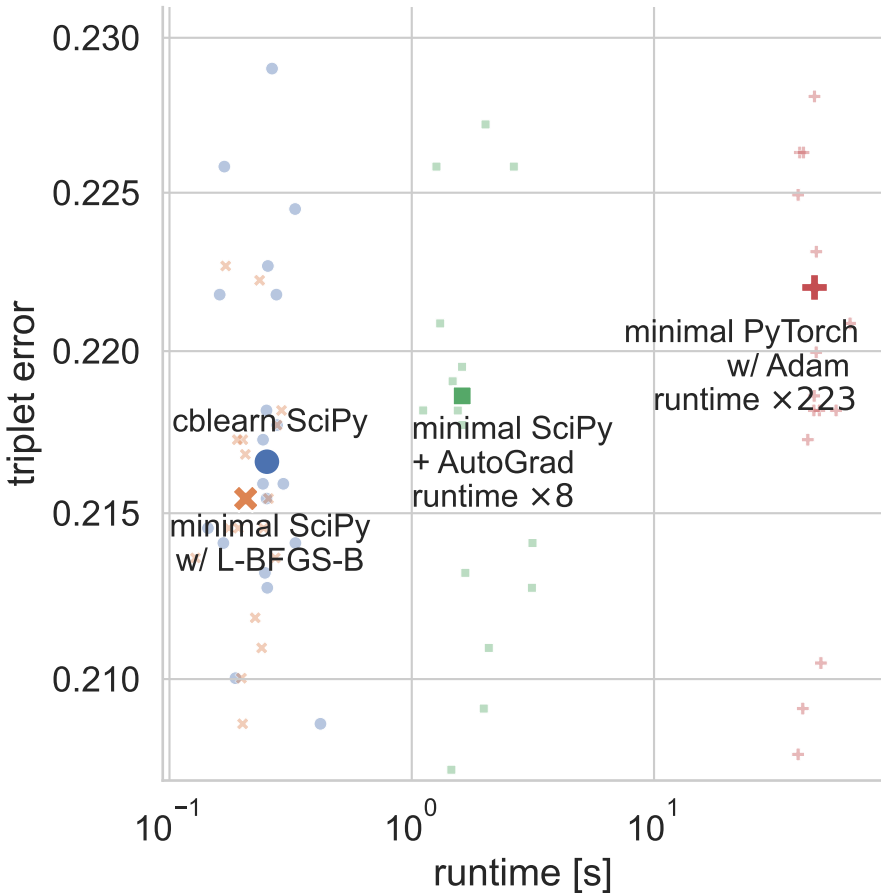

Supplement: supplementary_material [file torch_speedtest_triplets.pdf › lore_code/env/cblearn/paper/images/torch_speedtest_triplets.pdf]
